# Supplementary material for: PDI-based heteroacenes as acceptors for fullerene-free solar cells: importance of their twisted geometry
Source: Royal Society of Chemistry journal article supplement (doi:10.1039/d0nj01733g), 2020-01-01
Supplement: d0nj01733g1.pdf [file d0nj01733g1.pdf]

## **PDI-Based Heteroacenes as Acceptors for Fullerene-free Solar Cells: Importance of the Twisted Geometry**

Huaqing Chen,<sup>†</sup> Ling Wang,<sup>†</sup> Hua Sun,<sup>§</sup> Qian Liu,<sup>†</sup> Xiao Tan,<sup>†</sup> Shenglong Sang,<sup>†</sup> Bo Wu,<sup>†</sup> Cong Zhang,<sup>†</sup> Fei Chen,<sup>\*,†,‡</sup> Xiao-Chun Hang,<sup>\*,†</sup> and Zhi-Kuan Chen,<sup>\*,†,‡</sup>

<sup>†</sup>*Key Laboratory of Flexible Electronics (KLOFE) & Institute of Advanced Materials (IAM), Nanjing Tech University, 30 South Puzhu Road, Nanjing, 211816 (P. R. China)*

<sup>‡</sup>*Department of Mechanical, Materials and Manufacturing Engineering and Department of Chemical and Environmental Engineering, The University of Nottingham, Ningbo China, 199 Taikang East Road, Ningbo 315100, P. R. China*

<sup>§</sup>*School of Material and Chemistry Engineering, Xuzhou University of Technology, Xuzhou, China*

### **AUTHOR INFORMATION**

Corresponding Author

\*E-mail: [fei.chen@nottingham.edu.cn](mailto:fei.chen@nottingham.edu.cn) (F. C.)

\*E-mail: [iamxchhang@njtech.edu.cn](mailto:iamxchhang@njtech.edu.cn) (X.-C. H.)

\*E-mail: [zhikuan.chen@nottingham.edu.cn](mailto:zhikuan.chen@nottingham.edu.cn) (Z.-K. C.)

## **Experimental Section**

### **1. Materials**

All reagents and chemicals were purchased from commercial sources and used without further purification unless stated otherwise. Toluene were freshly distilled before use by sodium drying. PTB7-Th was purchased from 1-Material (Canada). FPDIT were synthesized according to literature procedures.<sup>1</sup>

## 2. Synthesis and Characterization

### 2.1

#### 2.1 FPDI-T-Br

FPDI-T (7.93 g, 5.00 mmol) was dissolved in  $\text{CHCl}_3$  (100 mL). Bromine (10 mL) was then added, and the solution was stirred at 30 °C for 48 h. The reaction was quenched with sodium thiosulfate solution and extracted twice with  $\text{CHCl}_3$ . The combined organics were washed with water, dried over  $\text{Na}_2\text{SO}_4$ , and filtered. The residue was purified by flash column chromatography (eluent: n-hexane/dichloromethane = 2:1) to obtain a red solid (3.75 g, 45%) as the product;  $^1\text{H}$  NMR (400 MHz,  $\text{CDCl}_3$ )  $\delta$  (ppm): 10.79-10.49 (m, 3H), 9.92 (d,  $J = 11.6$  Hz, 2H), 9.60-9.31 (m, 3H), 9.13 (s, 3H), 5.37 (m, 4H), 2.52-2.24 (m, 8H), 2.05-1.86 (m, 8H), 1.09-1.49 (m, 64H), 0.94-0.64 (m, 24H).  $^{13}\text{C}$  NMR (100MHz,  $\text{CDCl}_3$ , 300K):  $\delta$  164.60, 163.88, 140.98, 140.74, 137.02, 133.33, 132.98, 132.56, 132.04, 131.68, 131.17, 130.10, 129.38, 128.90, 127.85, 127.51, 127.03, 126.67, 126.23, 125.90, 125.48, 125.31, 124.84, 124.39, 123.77, 123.50, 122.38, 121.17, 55.27, 32.47, 32.18, 31.84, 30.24, 29.31, 27.09, 23.06, 22.65, 22.47, 14.20, 14.10, 13.95. MS (MALDI-TOF)  $m/z$ : calcd. for  $\text{C}_{104}\text{H}_{119}\text{BrN}_4\text{O}_8\text{S}$ : 1665.79; found: 1665.85.

#### 2.2 P<sub>4</sub>3T

Under N<sub>2</sub> atmosphere, a mixture of 2,5-bis(trimethylstannyl)thiophene (148 mg, 0.36 mmol), FPDI-T-Br (1.20 g, 0.72 mmol), Pd(PPh<sub>3</sub>)<sub>4</sub> (24 mg, 0.02 mmol), and toluene (120 mL) were heated to 110 °C for 48 h. The reaction mixture was then cooled to room temperature and extracted twice with CHCl<sub>3</sub>. The organic layer was combined, washed with brine, dried over Na<sub>2</sub>SO<sub>4</sub>, and filtered. The residue was purified by flash column chromatography (eluent: n-hexane/dichloromethane = 1:1) to obtain a black violet solid (749 mg, 64%) as the product; <sup>1</sup>H NMR (400 MHz, CDCl<sub>3</sub>) δ (ppm): 10.77-10.55 (m, 4H), 9.96 (s, 4H), 9.70-9.26 (m, 8H), 9.17 (s, 4H), 8.98 (s, 2H), 7.71 (s, 2H), 5.38 (s, 8H), 2.53-2.24 (m, 16H), 1.87-2.07 (m, 16H), 1.49-1.06 (m, 128H), 0.96-0.66 (m, 48H). <sup>13</sup>C NMR (100 MHz, CDCl<sub>3</sub>, 323K): Numerous carbon resonances overlap, leading to less signals than the number of carbons. δ 164.80, 163.94, 147.69, 144.30, 140.81, 133.53, 133.19, 132.30, 131.28, 130.22, 129.54, 128.96, 127.64, 127.18, 126.19, 125.64, 125.01, 124.56, 124.07, 123.81, 123.61, 123.21, 122.44, 55.29, 54.70, 32.57, 32.20, 31.83, 30.26, 29.34, 27.10, 26.95, 23.08, 22.66, 22.47, 14.10. MS (MALDI-TOF) m/z: calcd. for C<sub>212</sub>H<sub>240</sub>N<sub>8</sub>O<sub>16</sub>S<sub>3</sub>: 3251.74; found: 3251.75.

### 2.3 P<sub>4</sub>TT2T

Under N<sub>2</sub> atmosphere, a mixture of 2,5-bis(trimethylstannyl)thieno[3,2-b]thiophene (168 mg, 0.36 mmol), FPDI-T-Br (1.20 g, 0.72 mmol),

Pd(PPh<sub>3</sub>)<sub>4</sub> (24 mg, 0.02 mmol), and toluene (120 mL) were heated to 110 °C for 48 h. The reaction mixture was then cooled to room temperature and extracted twice with CHCl<sub>3</sub>. The organic layer was combined, washed with brine, dried over Na<sub>2</sub>SO<sub>4</sub>, and filtered. The residue was purified by flash column chromatography (eluent: n-hexane/dichloromethane = 1:1) to obtain a black violet solid (810 mg, 68%) as the product; <sup>1</sup>H NMR (400 MHz, CDCl<sub>3</sub>) δ (ppm): 10.65 (d, J = 10.3 Hz, 4H), 9.95 (s, 4H), 9.52-9.29 (m, 8H), 9.15 (s, 4H), 8.91 (s, 2H), 7.91 (d, J = 11.7 Hz, 2H), 5.37 (s, 8H), 2.57-2.28 (m, 16H), 2.06-1.87 (m, 16H), 1.47-1.06 (m, 128H), 0.95-0.65 (m, 48H). <sup>13</sup>C NMR (100 MHz, CDCl<sub>3</sub>, 323K): Numerous carbon resonances overlap, leading to less signals than the number of carbons. δ 164.81, 163.86, 149.18, 147.61, 141.83, 140.97, 140.74, 140.17, 138.94, 134.33, 133.41, 133.05, 132.22, 131.58, 131.24, 129.71, 128.90, 127.54, 127.10, 125.61, 125.02, 124.43, 123.78, 123.52, 123.15, 122.39, 119.90, 119.06, 118.86, 116.95, 55.26, 32.78, 32.53, 32.25, 31.86, 31.52, 30.20, 29.72, 29.35, 27.10, 23.10, 22.68, 22.49, 14.13. MS (MALDI-TOF) m/z: calcd. for C<sub>214</sub>H<sub>240</sub>N<sub>8</sub>O<sub>16</sub>S<sub>4</sub>: 3307.72; found: 3307.64.

## 2.4 FP<sub>4</sub>3T

Under N<sub>2</sub> atmosphere, P<sub>4</sub>3T (650 mg, 0.2 mmol) in 50 mL toluene, a solution of FeCl<sub>3</sub> (1.62 g, 10 mmol) in 2 mL CH<sub>3</sub>NO<sub>2</sub> was added, and then the reactant solution was heated to reflux and kept stirring for 3 h. The

mixture was cooled to room temperature and extracted by  $\text{CHCl}_3$ , and the organic phase was separated, washed by water and brine, dried over anhydrous  $\text{Na}_2\text{SO}_4$  and concentrated. The crude product was purified by flash chromatography on silica gel (eluent: dichloromethane/hexane = 1:1) to afford FP<sub>4</sub>3T (403 mg, 62%) as a red solid;  $^1\text{H}$  NMR (600 MHz,  $\text{C}_2\text{D}_2\text{Cl}_4$ , 373K)  $\delta$  (ppm): 11.66 (s, 1H), 11.52-11.22 (m, 2H), 11.15-10.96 (m, 2H), 10.76 (d,  $J = 53.4$  Hz, 2H), 10.58-10.41 (m, 1H), 10.32-10.07 (m, 2H), 9.84-9.45 (m, 6H), 9.46-9.19 (m, 4H), 5.80-5.30 (m, 8H), 2.76-2.49 (m, 20H), 2.32-2.09 (m, 24H), 1.55-1.32 (m, 103H), 1.00 (s, 60H).  $^{13}\text{C}$  NMR (100 MHz,  $\text{CDCl}_3$ , 323K): Numerous carbon resonances overlap, leading to less signals than the number of carbons.  $\delta$  165.03, 164.32, 163.77, 141.54, 140.14, 133.69, 132.54, 131.92, 129.41, 127.53, 126.32, 125.86, 124.71, 123.94, 123.01, 55.69, 55.31, 32.58, 31.90, 30.34, 29.70, 29.39, 27.20, 23.18, 22.70, 14.55, 14.14. MS (MALDI-TOF,  $m/z$ ): calcd. for  $\text{C}_{212}\text{H}_{236}\text{N}_8\text{O}_{16}\text{S}_3$ , For  $[\text{M}+\text{H}]^+$ : 3248.71; found: 3249.03.

## 2.5 FP<sub>4</sub>TT2T

Under  $\text{N}_2$  atmosphere, P<sub>4</sub>TT2T (650 mg, 0.2 mmol) in 50 mL toluene, a solution of  $\text{FeCl}_3$  (1.62 g, 10 mmol) in 2 mL  $\text{CH}_3\text{NO}_2$  was added, and then the reactant solution was heated to reflux and kept stirring for 3 h. The mixture was cooled to room temperature and extracted by  $\text{CHCl}_3$ , and the organic phase was separated, washed by water and brine, dried over

anhydrous Na<sub>2</sub>SO<sub>4</sub> and concentrated. The crude product was purified by flash chromatography on silica gel (eluent: dichloromethane/hexane = 1:1) to afford FP<sub>4</sub>TT<sub>2</sub>T (396 mg, 60%) as a red solid; <sup>1</sup>H NMR (600 MHz, C<sub>2</sub>D<sub>2</sub>Cl<sub>4</sub>, 373K) δ (ppm): 11.59-10.48 (m, 8H), 10.18 (s, 2H), 9.51 (d, J = 154.0 Hz, 10H), 6.00-4.98 (m, 8H), 2.75-2.39 (m, 24H), 2.29-2.09 (m, 16H), 1.63-1.38 (m, 108H), 1.14-0.89 (m, 60H). <sup>13</sup>C NMR (100 MHz, CDCl<sub>3</sub>, 323K): Numerous carbon resonances overlap, leading to less signals than the number of carbons. δ 164.87, 164.21, 133.73, 133.29, 132.53, 131.84, 131.53, 130.86, 130.28, 130.08, 129.20, 127.45, 126.77, 126.15, 125.69, 125.34, 124.46, 123.91, 123.47, 122.98, 122.07, 121.86, 121.01, 120.75, 120.72, 119.83, 55.80, 55.38, 32.39, 31.94, 29.71, 29.44, 27.18, 22.76, 14.21. MS (MALDI-TOF) m/z: calcd. for C<sub>214</sub>H<sub>236</sub>N<sub>8</sub>O<sub>16</sub>S<sub>4</sub>: 3303.68; found: 3303.25.

## 2.6 Materials Characterization

<sup>1</sup>H and <sup>13</sup>C NMR spectra were collected with a Bruker 400 MHz, 600 MHz, and 101 MHz spectrometer. Matrix-assisted laser desorption-ionization time-of-flight mass spectrometry (MALDI-TOF MS) analysis was performed on a Bruker Autoflex II. Thermogravimetric analysis (TGA) was performed on a TA Discovery TGA analyzer under nitrogen with a heating rate of 10 °C min<sup>-1</sup>. Differential scanning calorimetry (DSC) was performed on a TA Discovery DSC under nitrogen with a heating rate of

10 °C min<sup>-1</sup>. All of the simulations were performed by density functional theory (DFT) using the B3LYP hybrid functional with basis set 6-31G(d).<sup>2</sup> Electrochemical measurements were performed under nitrogen in deoxygenated 0.1 M solutions of tetra-*n*-butylammonium hexafluorophosphate in dry dichloromethane using a CHI660E electrochemical workstation, a glassy carbon working electrode, a platinum wire auxiliary electrode, and a Ag/AgCl reference electrode. Cyclic voltammograms were recorded at a scan rate of 100 mV s<sup>-1</sup>. Solution and thin-film UV-visible absorption spectra were recorded on a Shimadzu UV-1750 UV-vis spectrophotometer.

### **3. Devices Fabrication and Characterization**

#### **3.1 OSC Devices Fabrication**

The solar cells were fabricated with a structure of ITO/PEDOT:PSS/PTB7-Th:acceptor/PDIN/Al (ITO, indium tin oxide; PEDOT, poly(3,4-ethylenedioxythiophene); PSS, polystyrene sulfonate; PDIN, 2,9-Bis(3-(dimethylamino)propyl)anthra[2,1,9-def:6,5,10-def] diisoquinoline-1,3,8,10 (2H,9H)-tetraone). The patterned ITO glass was pre-cleaned in an ultrasonic bath of acetone and isopropyl alcohol, then treated in an ultraviolet-ozone chamber for 20 min. A thin layer (30 nm) of PEDOT:PSS (Baytron P, now Clevios VP AI 4083, from H. C. Starck, Leverkusen, Germany) was spin-coated onto the ITO glass and baked at 150 °C for 15

min. A solution (total of 20 mg mL<sup>-1</sup> dissolved in chlorobenzene) of PTB7-Th:acceptor blend was subsequently spin-coated (2000 rpm) on the PEDOT:PSS layer to form a photosensitive layer (~100 nm thick). The thickness of the photosensitive layer was measured using an Ambios Technology (Santa Cruz, CA) XP-2 profilometer. The methanolic solution (0.2% acetic acid) of PDIN at a concentration of 1.5 mg mL<sup>-1</sup> was deposited on the active layer at 3000 rpm for 30 s, producing a PDIN layer of ~13 nm. The aluminum layer (~100 nm) was deposited onto the surface of the PDIN layer subsequently through a shadow mask by thermal evaporation under vacuum (~10<sup>-5</sup>Pa) to form the cathode.

The  $J$ - $V$  curves of the prepared devices were measured with a computer-controlled Keithley (Zolix ss150 Solar Simulator) 236 source measure unit. A xenon lamp coupled with AM1.5 solar spectrum filters was used as the light source, the optical power at the sample was 100 mW cm<sup>-2</sup>. The light intensity of the solar simulator was calibrated using a standard silicon solar cell. The external quantum efficiency (EQE) spectra of the devices were measured using a solar cell quantum efficiency measurement system (Zolix Solar cell scan 100), consisting of model SR830 DSP lock-in amplifier coupled with a WDG3 monochromator and a 500 W xenon lamp.

### **3.2. Space Charge-Limited Current Method Measurement**

The transport properties of the devices were evaluated using the space



charge-limited current model with a HP4155A semiconductor parameter analyzer (Yokogawa Hewlett-Packard, Tokyo, Japan). The carrier mobility was extracted by fitting the  $J$ - $V$  curves in the near-quadratic region according to the modified Mott-Gurney equation<sup>3</sup>:

$$J = \frac{9}{8} \varepsilon \varepsilon_0 \mu \frac{V^2}{L^3} \left( 0.89 \beta \frac{\sqrt{V}}{\sqrt{L}} \right) \quad (1)$$

where  $J$  is the current density,  $\varepsilon_0$  is the permittivity of free space,  $\varepsilon$  is the relative permittivity,  $\mu$  is the zero-field mobility,  $V$  is the applied voltage,  $L$  is the thickness of the active layer, and  $\beta$  is the field-activation factor.

### 3. Figures and Tables

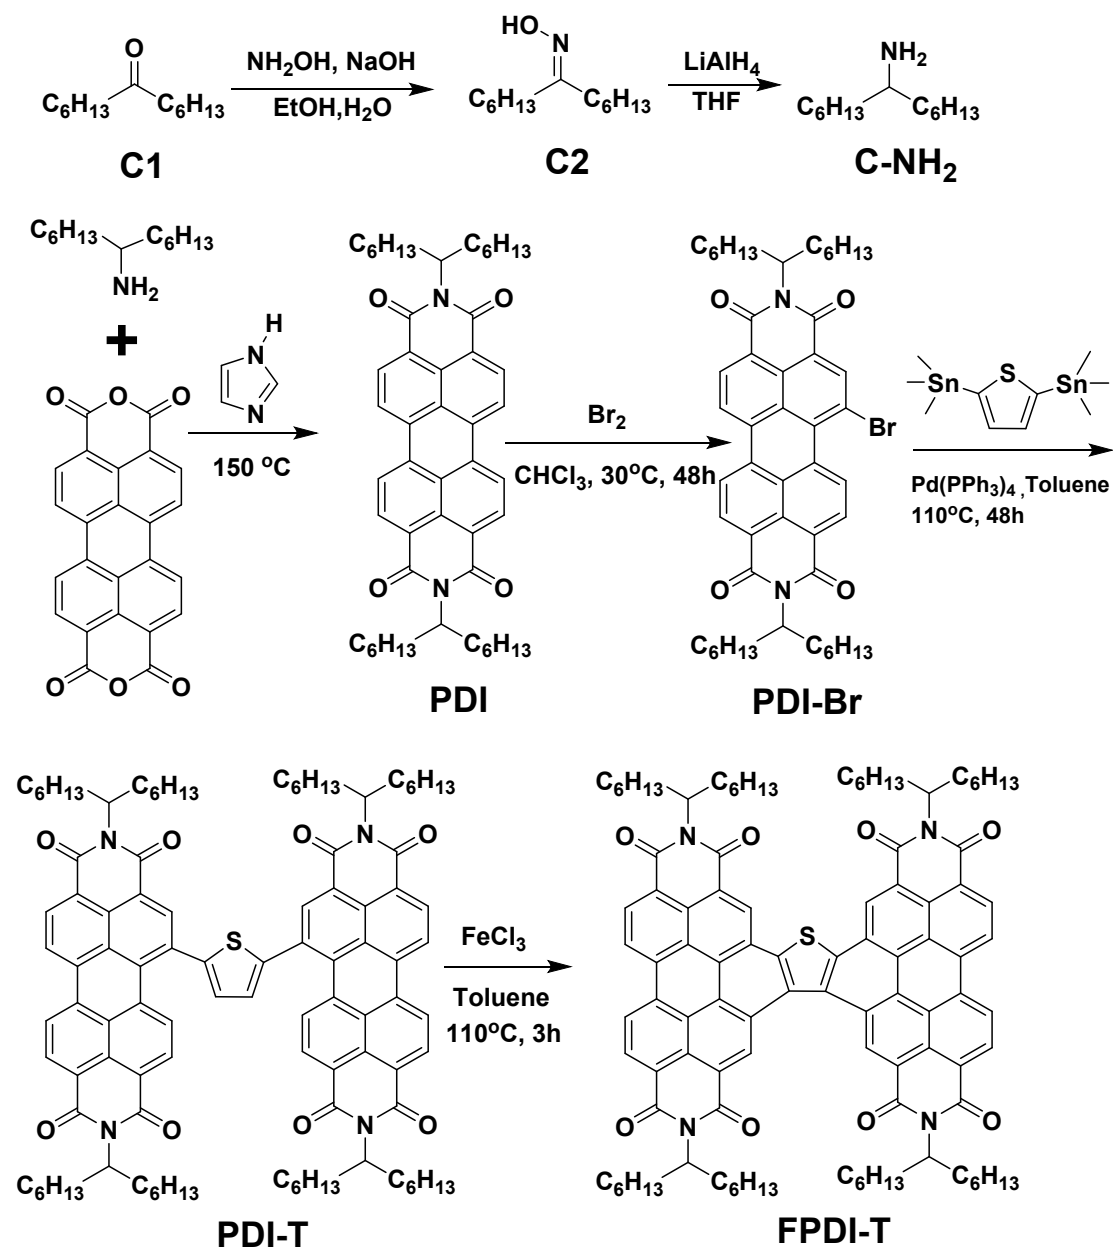

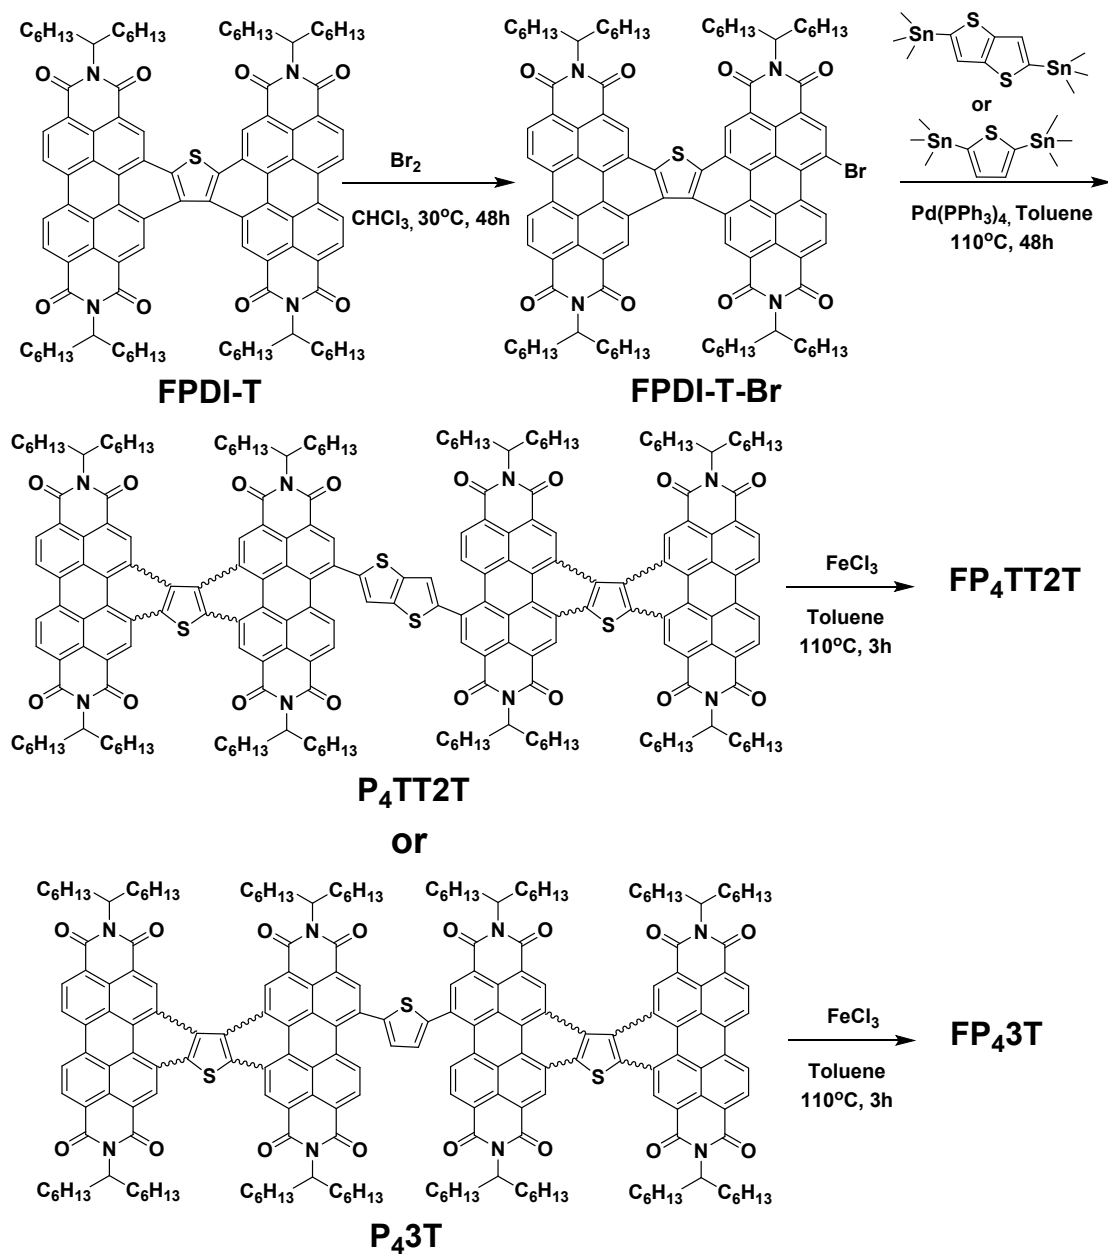

Scheme S1. Synthesis route of FP<sub>4</sub>3T and FP<sub>4</sub>TT2T.

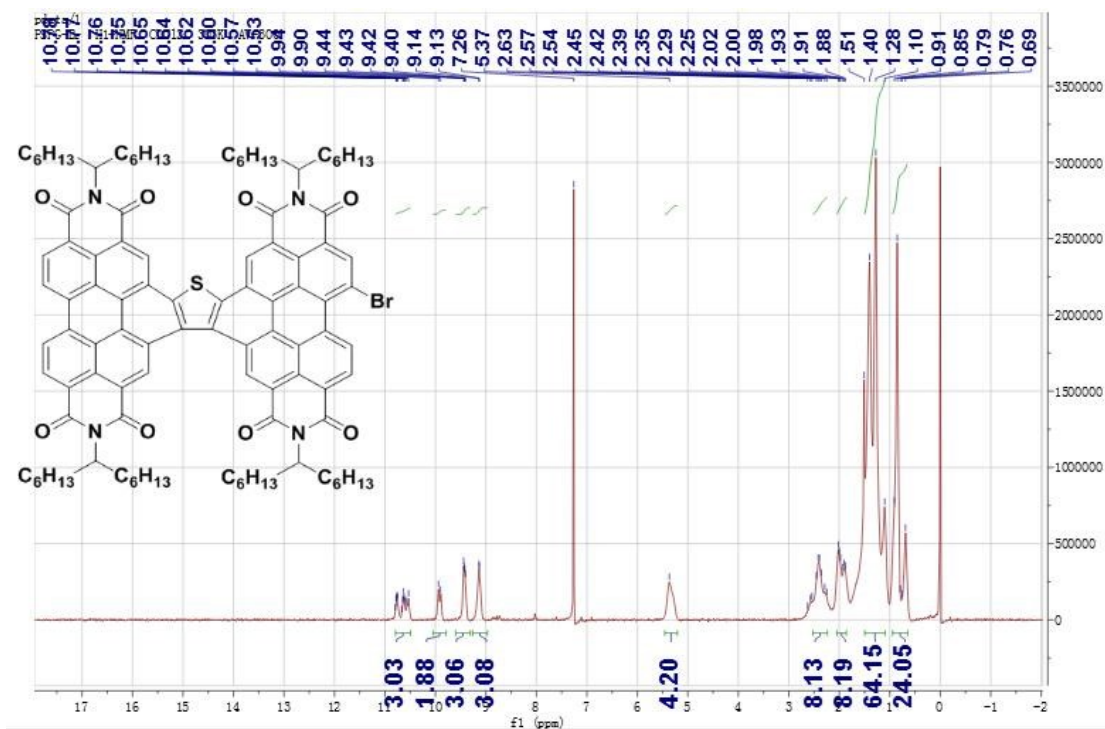

Figure S1.  $^1\text{H}$  NMR spectrum of FPDI-T-Br.

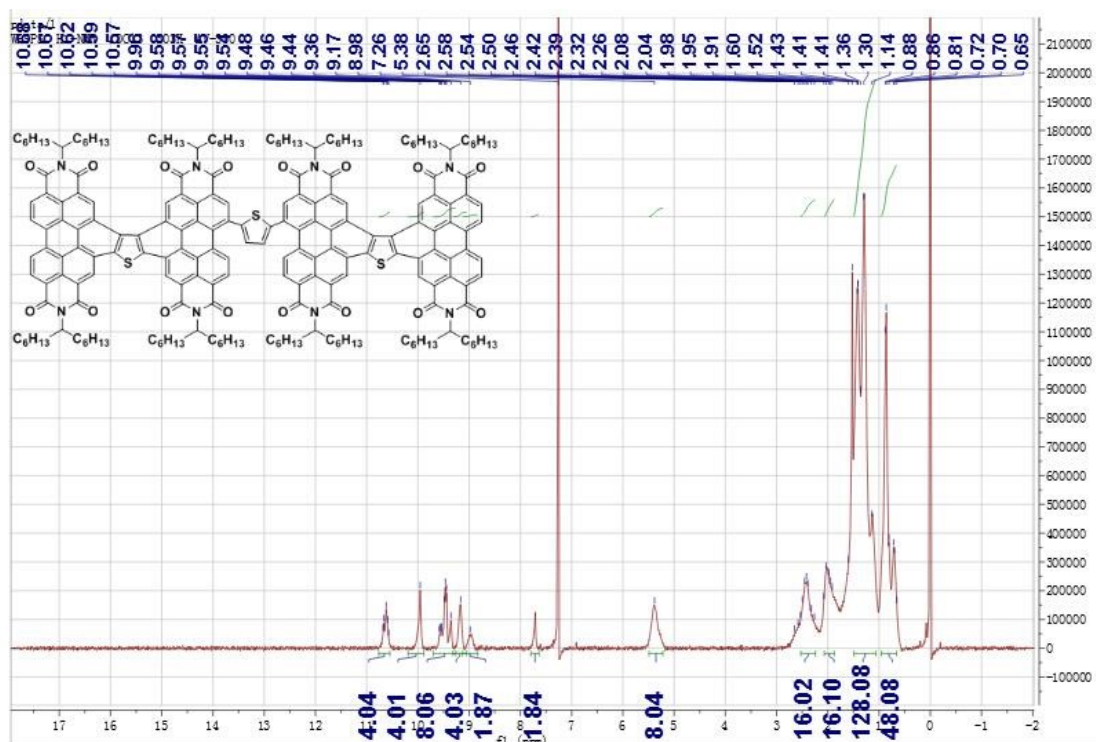

Figure S2.  $^1\text{H}$  NMR spectrum of P<sub>4</sub>3T.

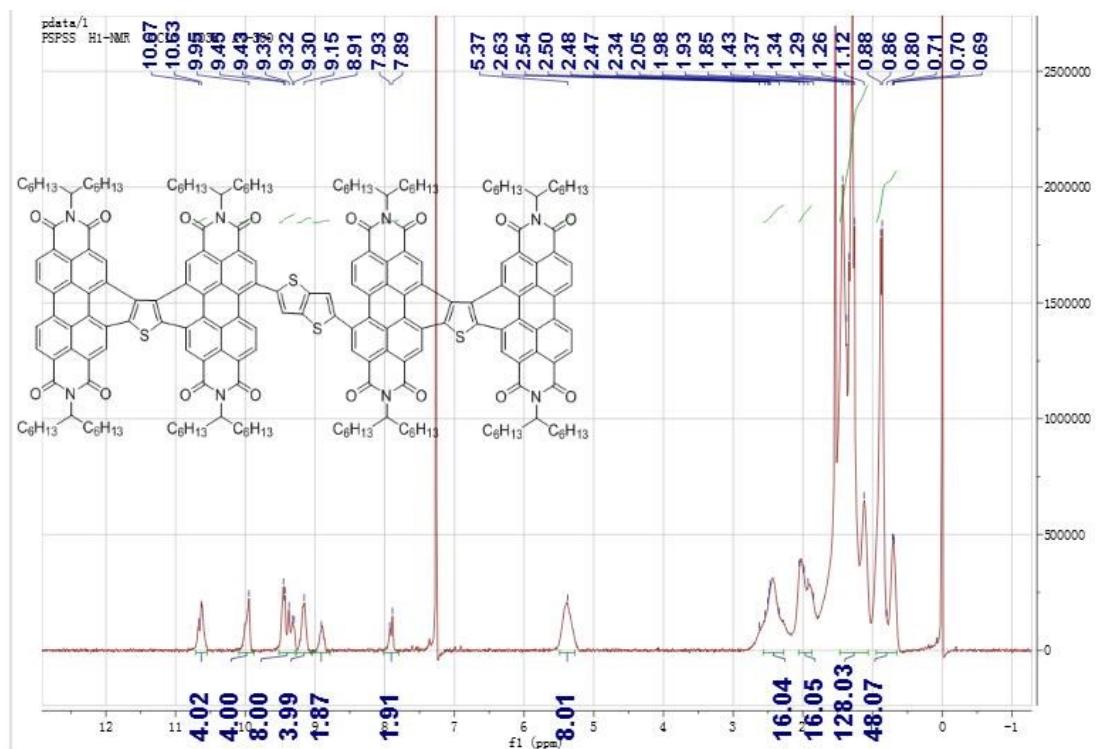

Figure S3. <sup>1</sup>H NMR spectrum of P<sub>4</sub>TT2T.

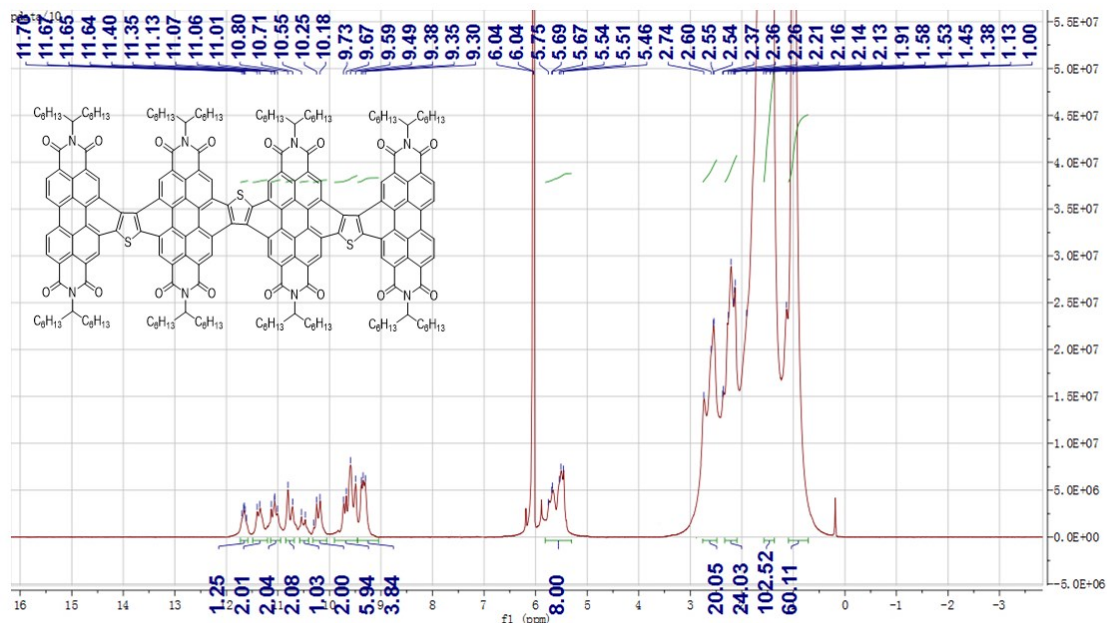

Figure S4. <sup>1</sup>H NMR spectrum of FP<sub>4</sub>3T.

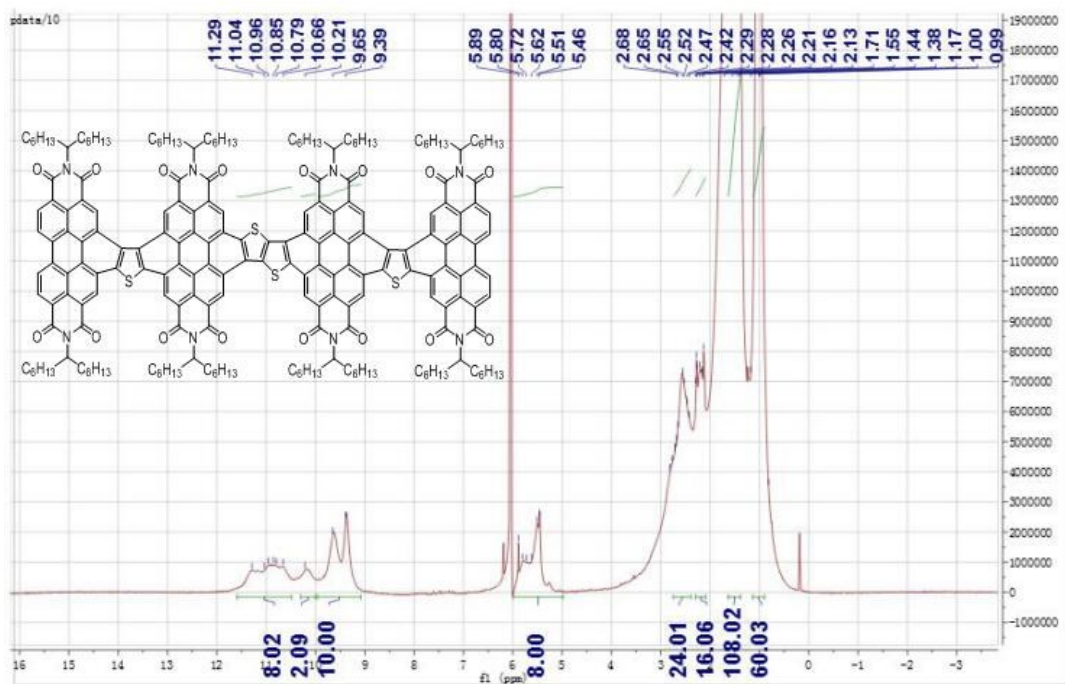

Figure S5. <sup>1</sup>H NMR spectrum of FP<sub>4</sub>TT<sub>2</sub>T.

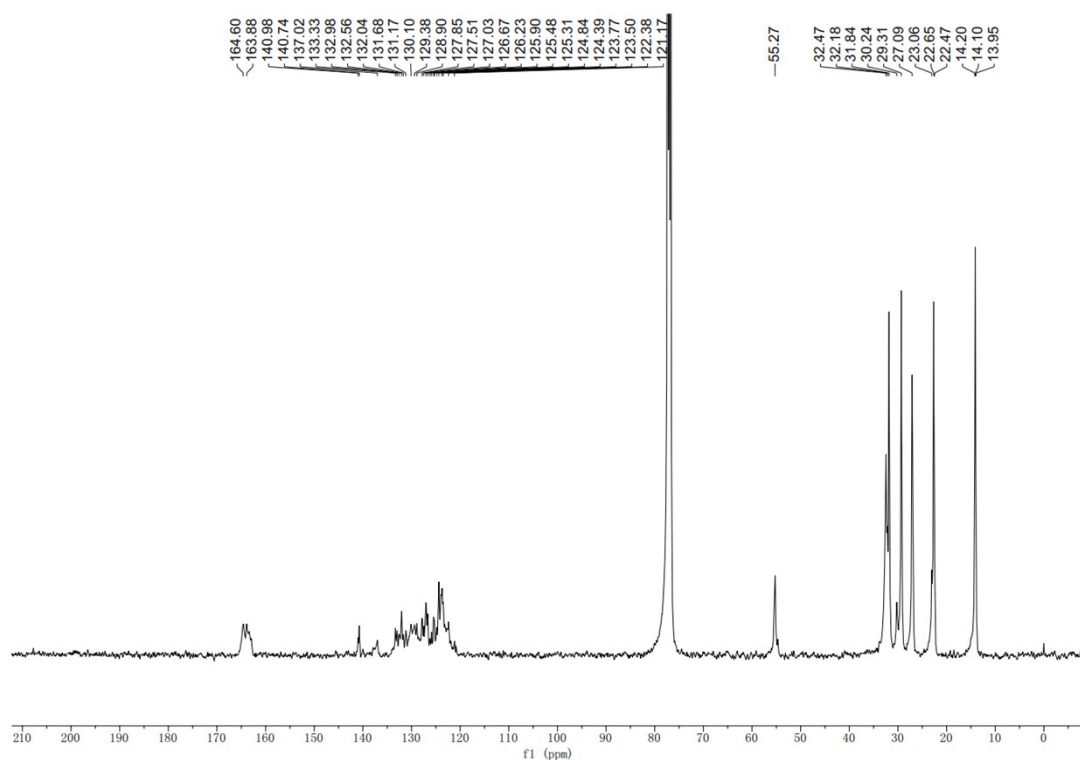

Figure S6. <sup>13</sup>C NMR of FPDI-T-Br.

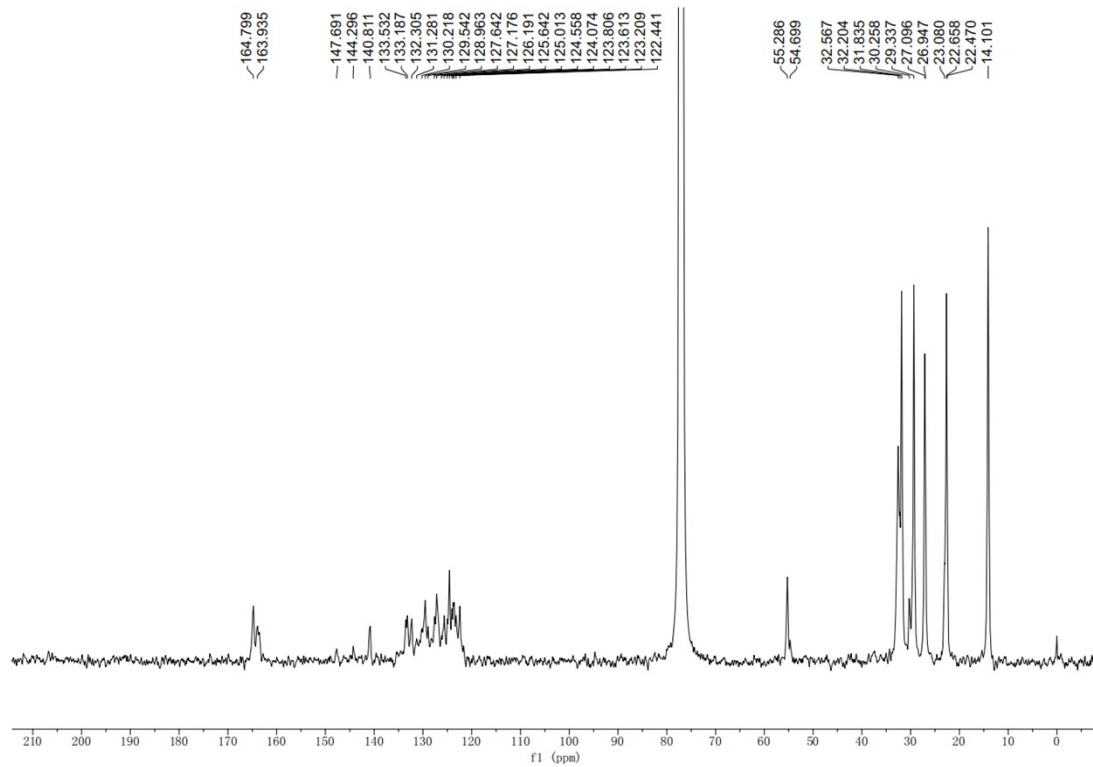

Figure S7.  $^{13}\text{C}$  NMR of P<sub>4</sub>3T.

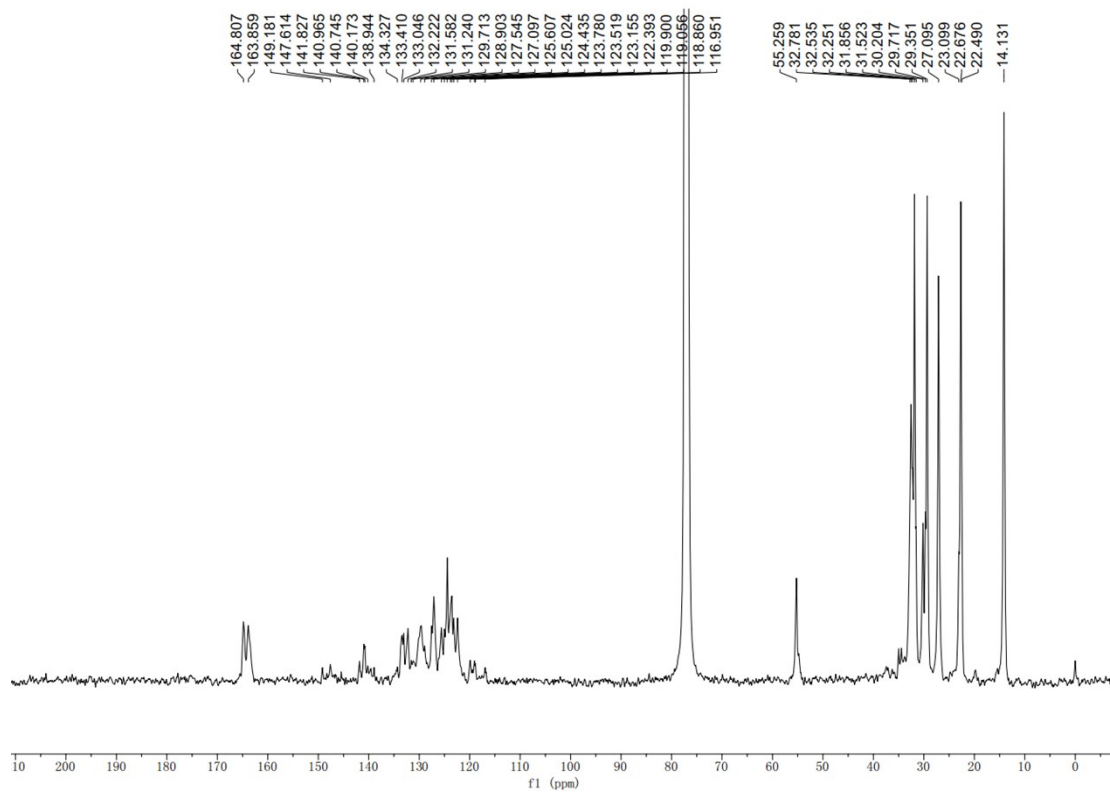

Figure S8.  $^{13}\text{C}$  NMR of P<sub>4</sub>TT2T.

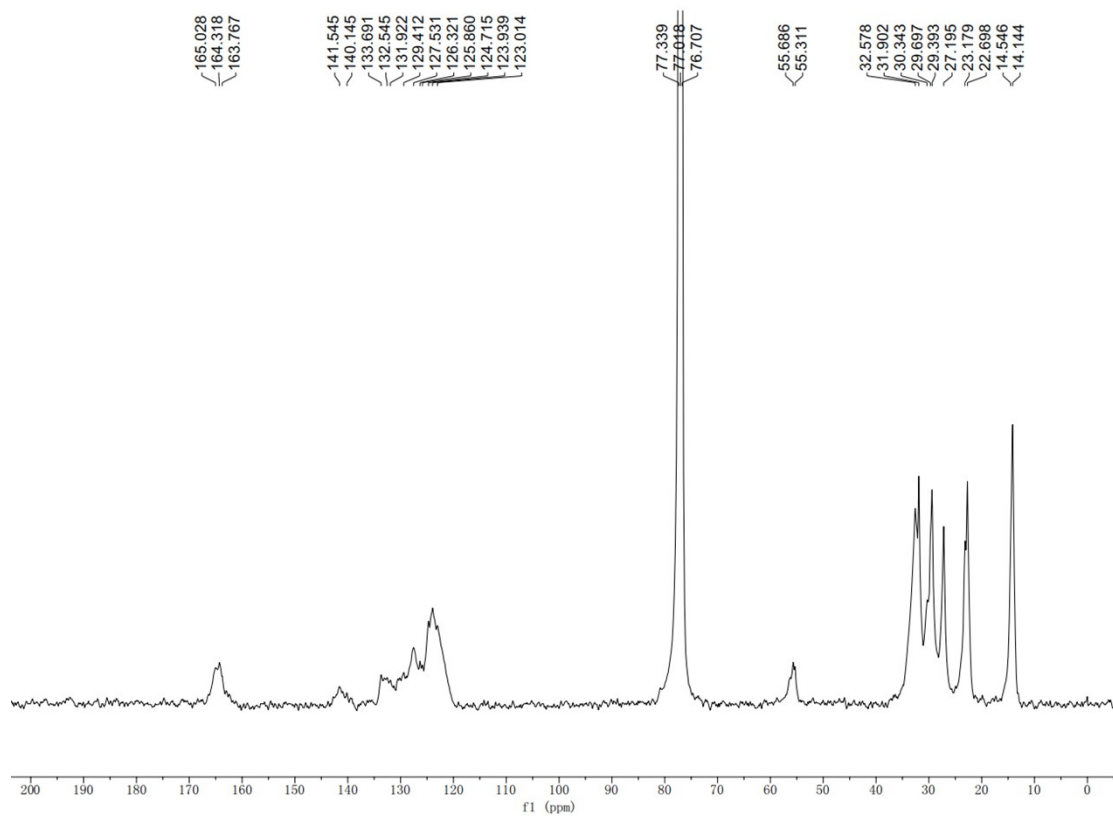

Figure S9.  $^{13}\text{C}$  NMR of FP<sub>4</sub>3T.

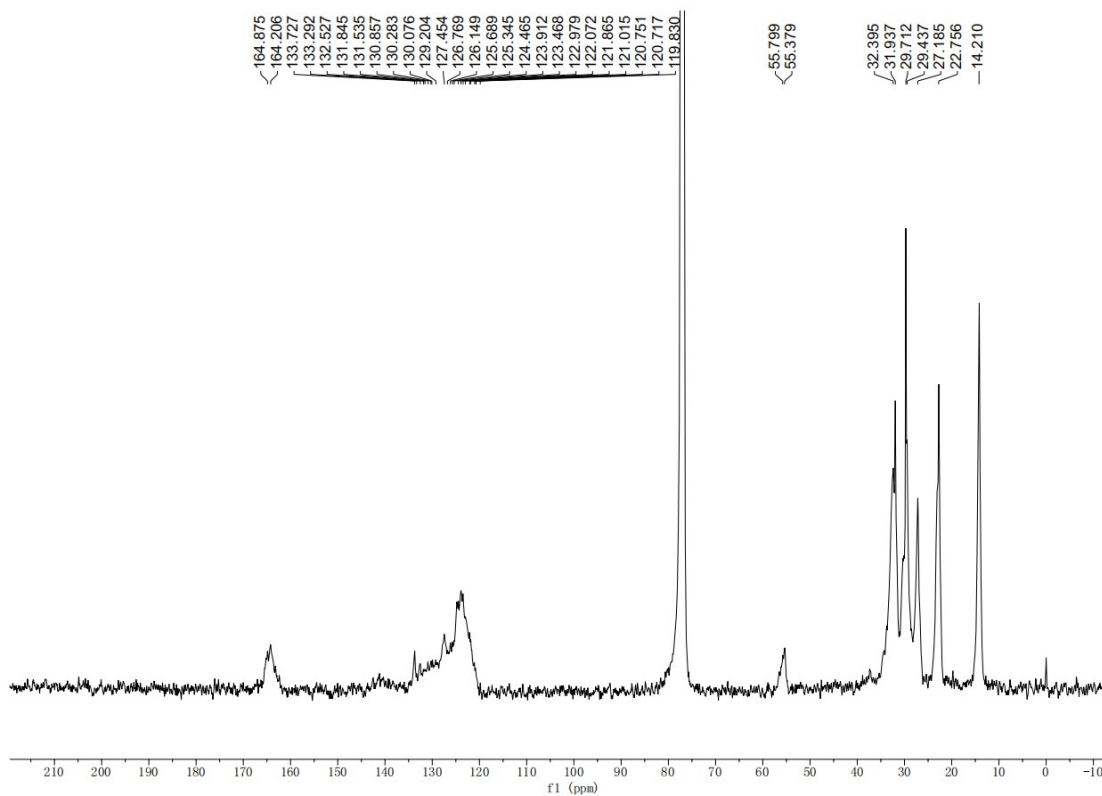

Figure S10.  $^{13}\text{C}$  NMR of FP<sub>4</sub>TT2T.



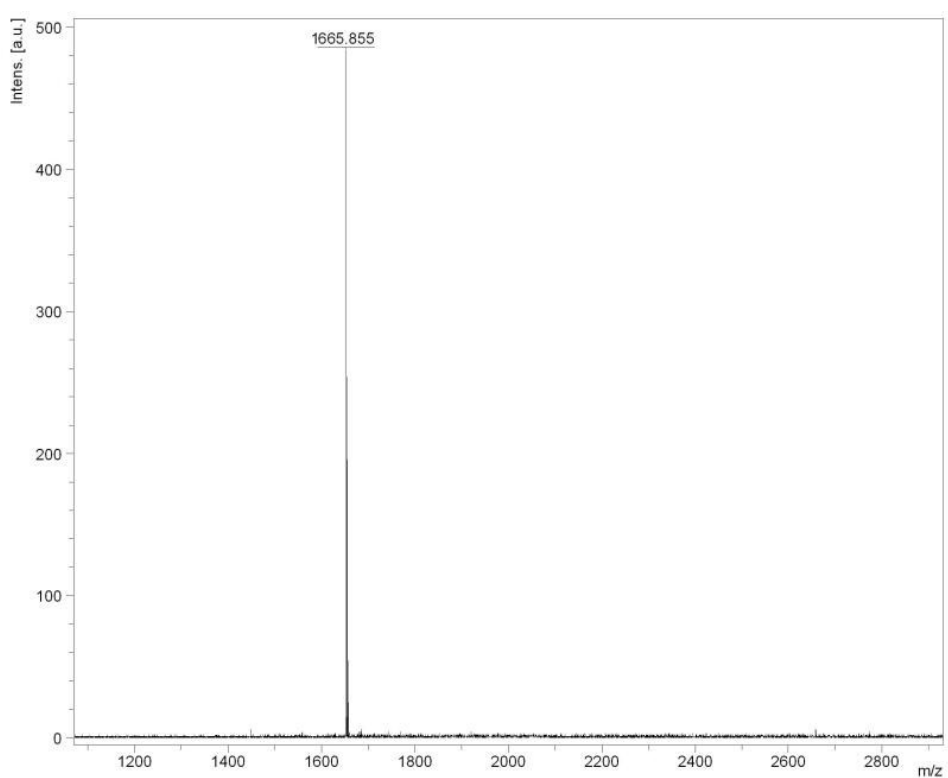

Figure S11. MALDI-TOF-MS of FPDI-T-Br.

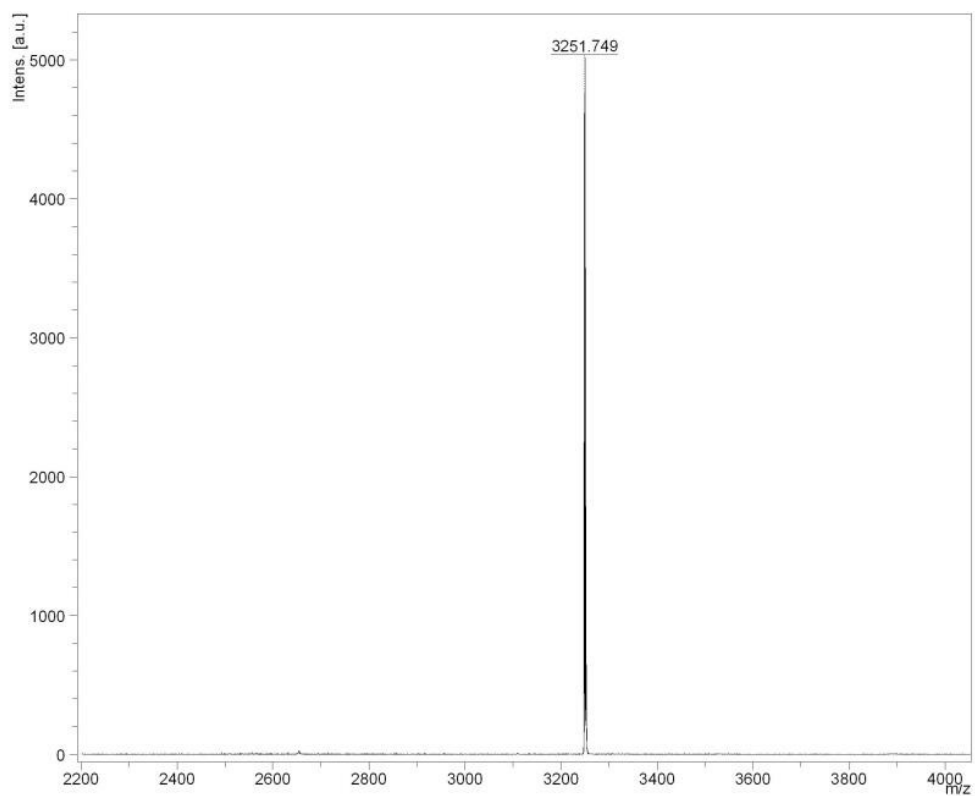

Figure S12. MALDI-TOF-MS of P<sub>4</sub>3T.

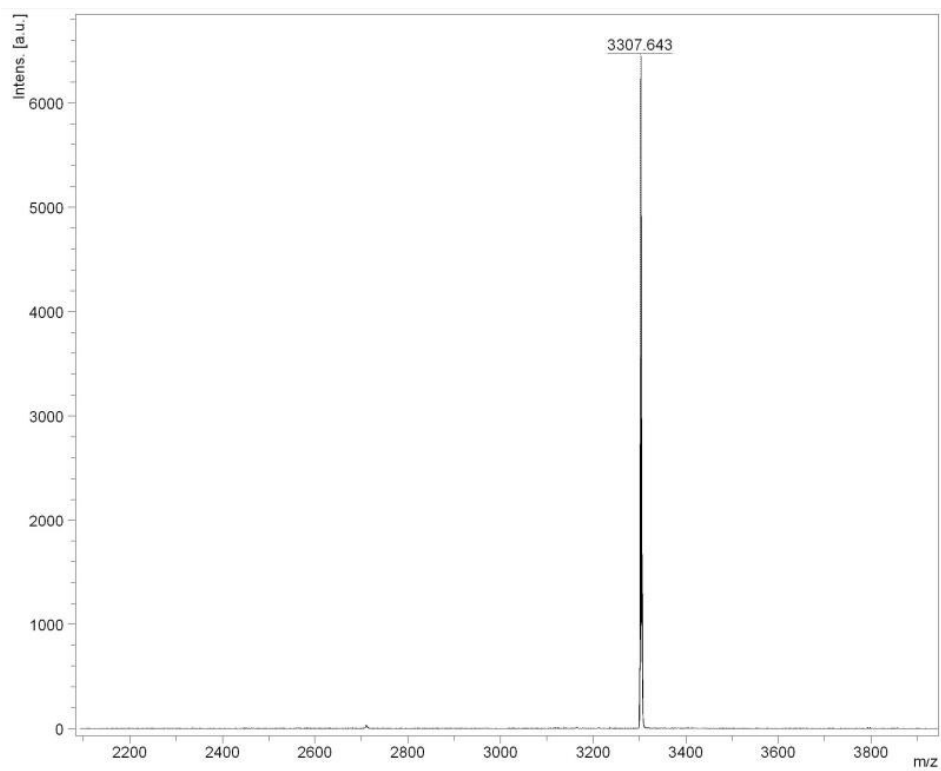

Figure S13. MALDI-TOF-MS of P<sub>4</sub>TT2T.

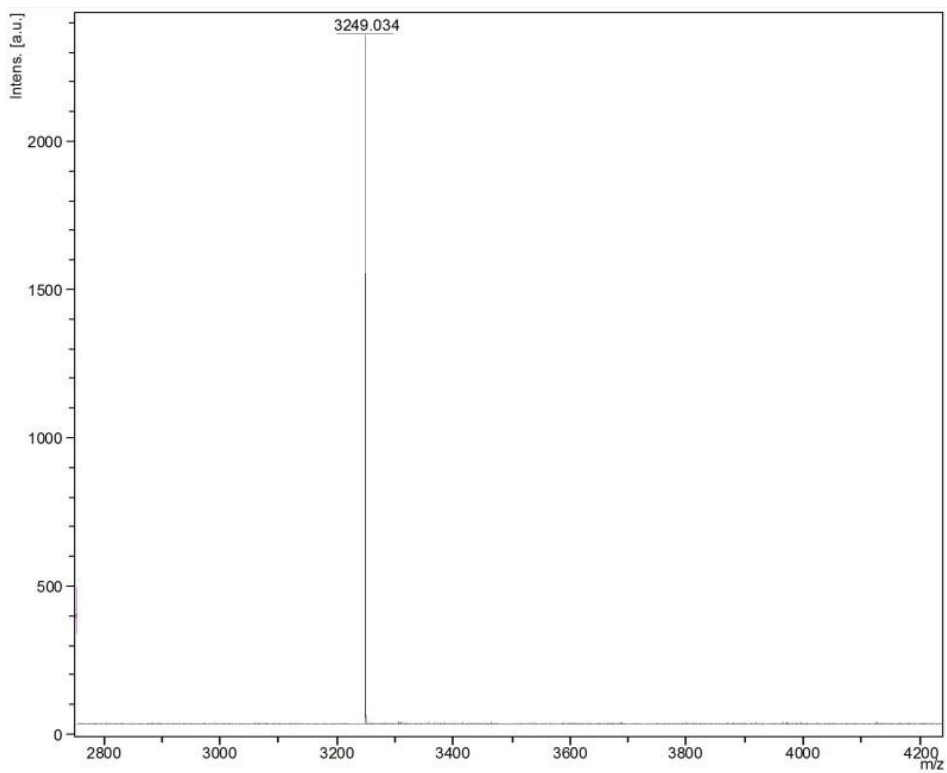

Figure S14. MALDI-TOF-MS of FP<sub>4</sub>3T.

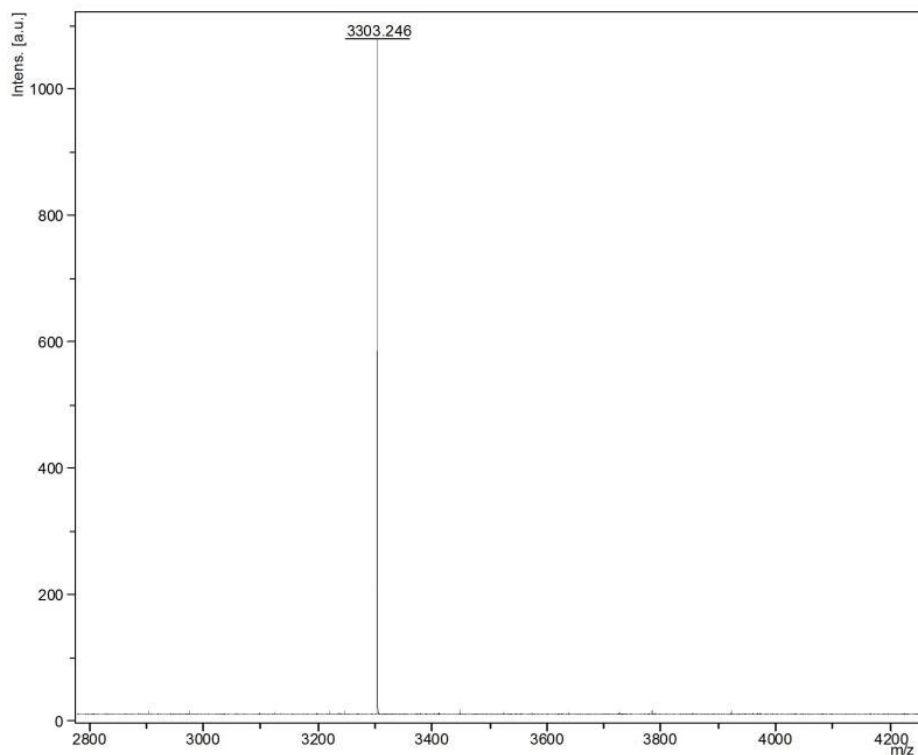

Figure S15. MALDI-TOF-MS of  $FP_4TT2T$ .

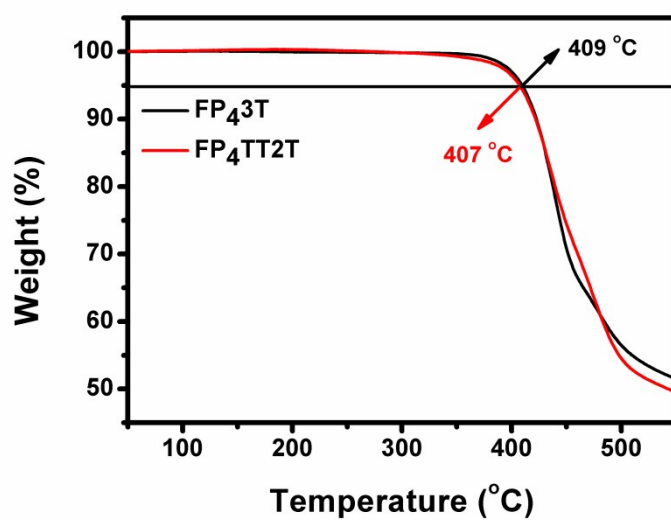

Figure S16. TGA curves of  $FP_43T$  and  $FP_4TT2T$ .

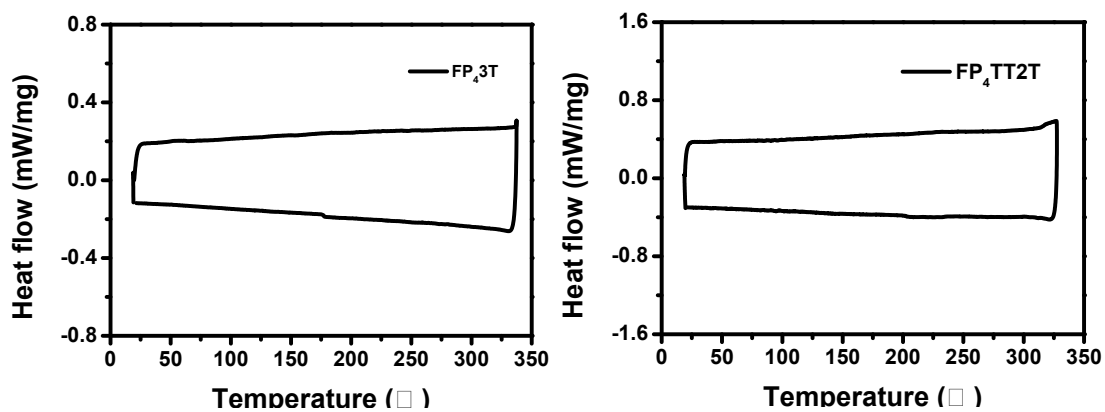

Figure S17. DSC curves of  $FP_43T$  and  $FP_4TT2T$ .

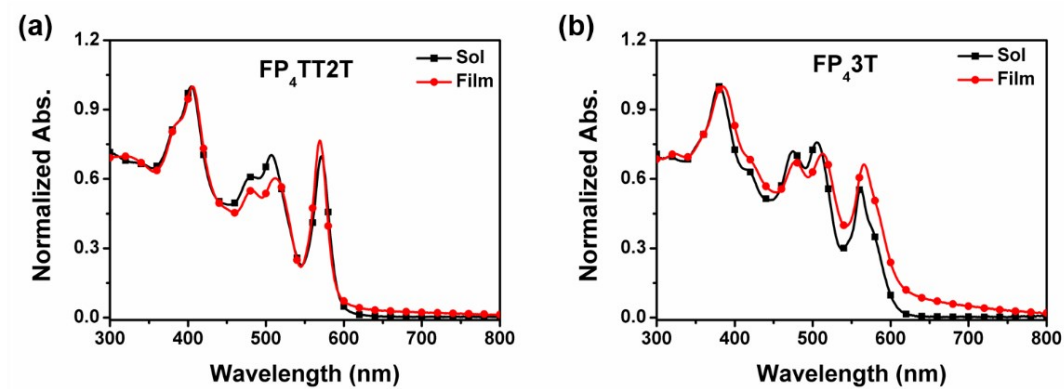

Figure S18. Absorption spectra of (a)  $FP_4TT2T$  and (b)  $FP_43T$  in solution and film states.

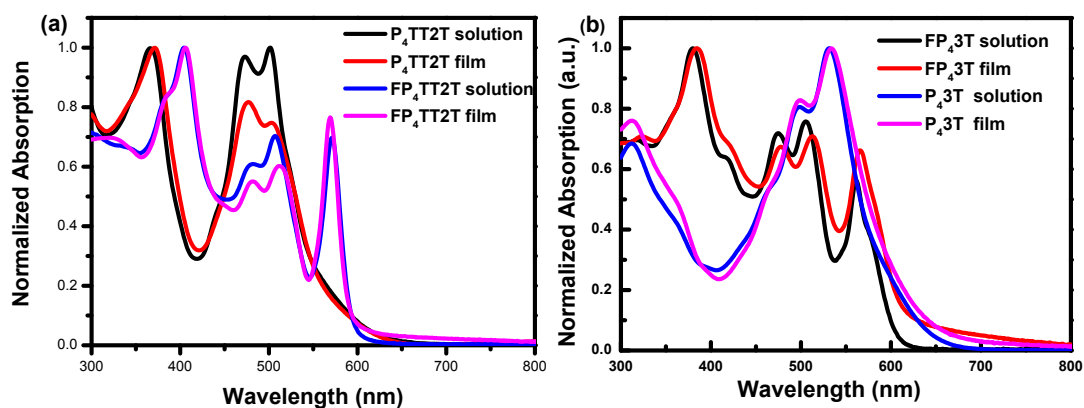

Figure S19. Absorption spectra of (a) P<sub>4</sub>TT2T and FP<sub>4</sub>TT2T (b) P<sub>4</sub>3T and FP<sub>4</sub>3T in solution and film states.

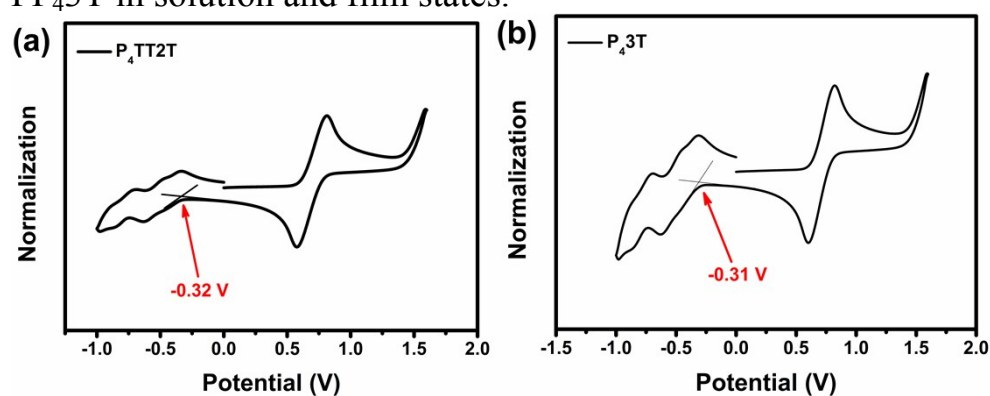

Figure S20. Cyclic voltammograms of P<sub>4</sub>TT2T and P<sub>4</sub>3T measured in 0.1 M solutions of tetra-*n*-butylammonium hexafluorophosphate in dry dichloromethane.

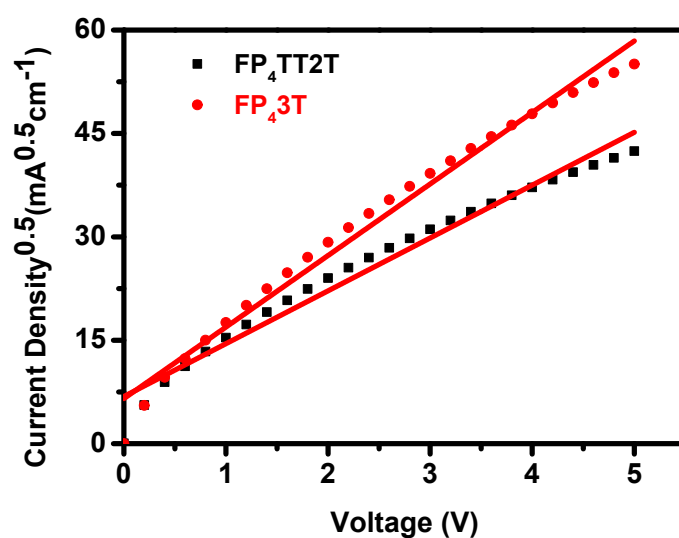

Figure S21.  $J^{0.5}$ - $V$  curves of hole-only devices based on FP<sub>4</sub>3T:PTB7-Th and FP<sub>4</sub>TT2T:PTB7-Th films.

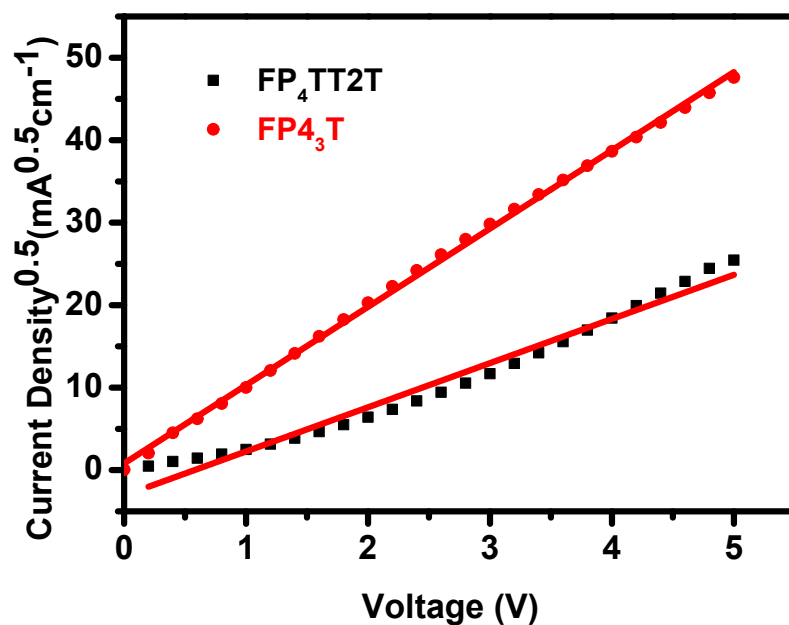

Figure S22.  $J^{0.5}$ - $V$  curves of electron-only devices based on FP<sub>4</sub>3T:PTB7-Th and FP<sub>4</sub>TT2T:PTB7-Th films.

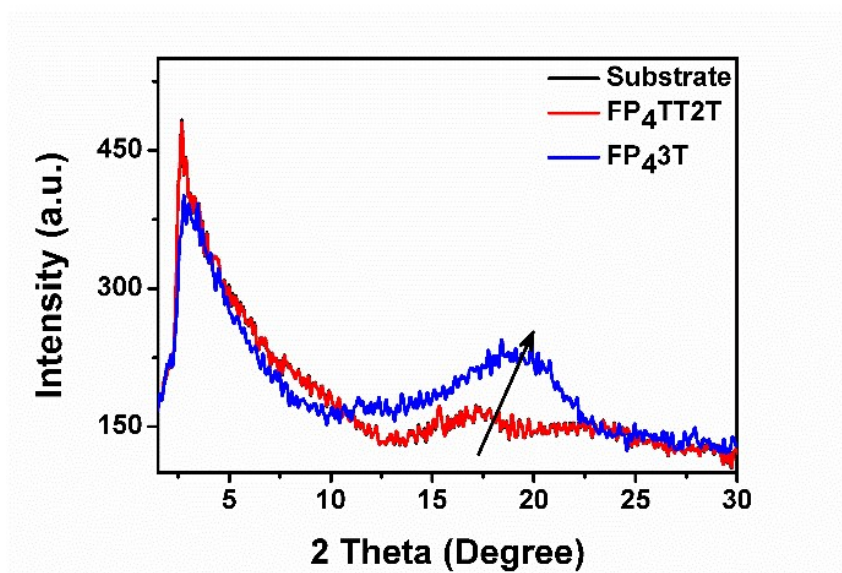

Figure S23. XRD patterns of FP<sub>4</sub>TT2T and FP<sub>4</sub>3T films.

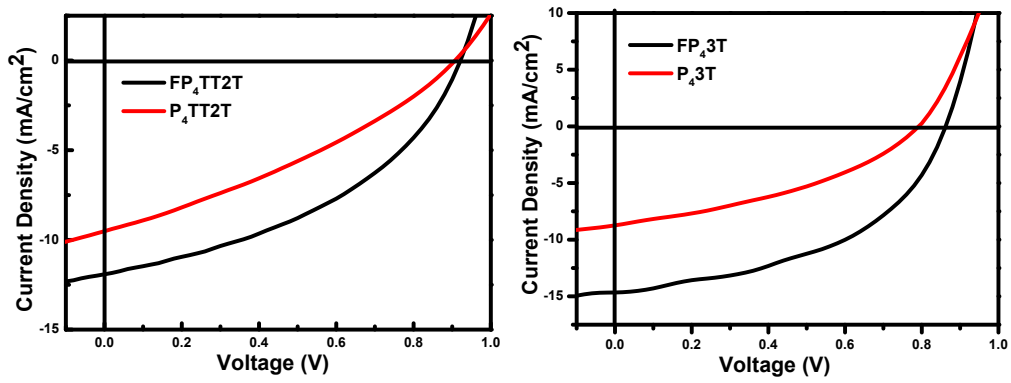

Figure S24.  $J$ - $V$  curves of the PTB7-Th:P<sub>4</sub>TT2T, PTB7-Th:FP<sub>4</sub>TT2T, PTB7-Th:P<sub>4</sub>3T, PTB7-Th:FP<sub>4</sub>3T based optimal solar cells devices under AM 1.5G irradiation (100 mW cm<sup>-2</sup>).

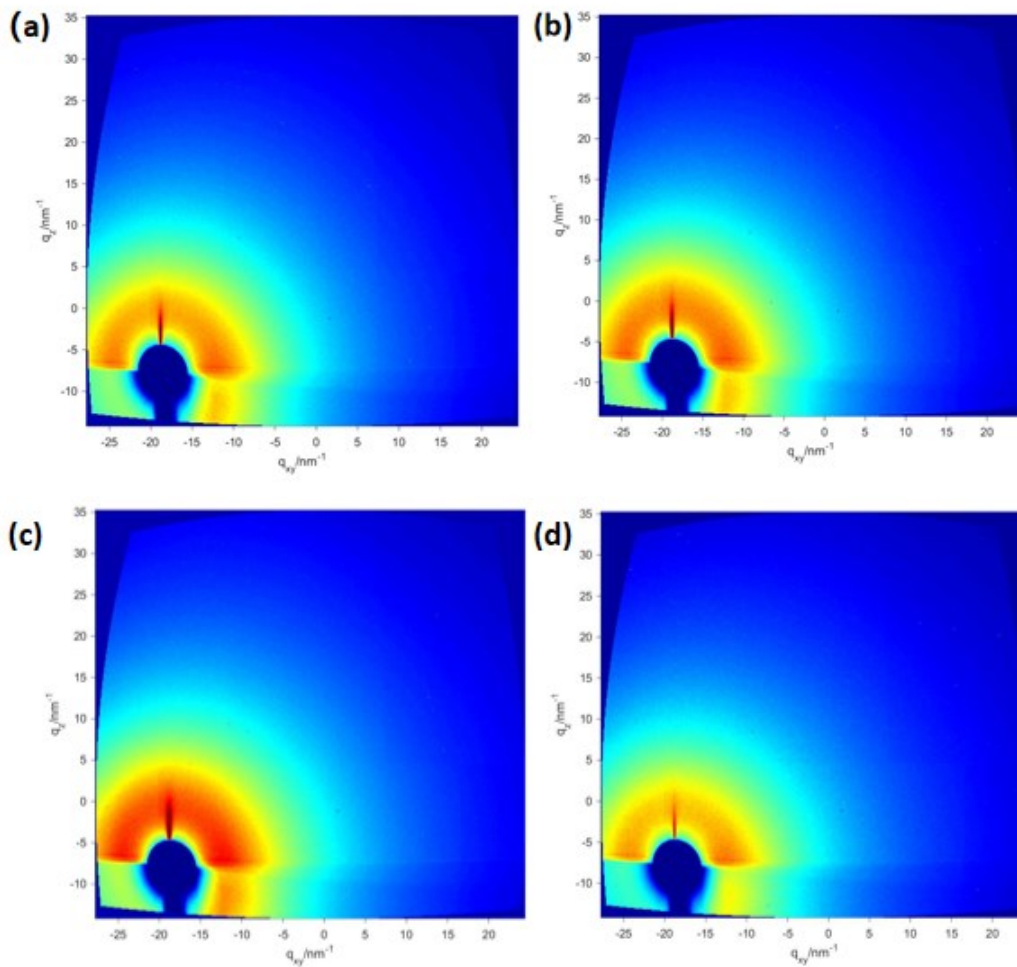

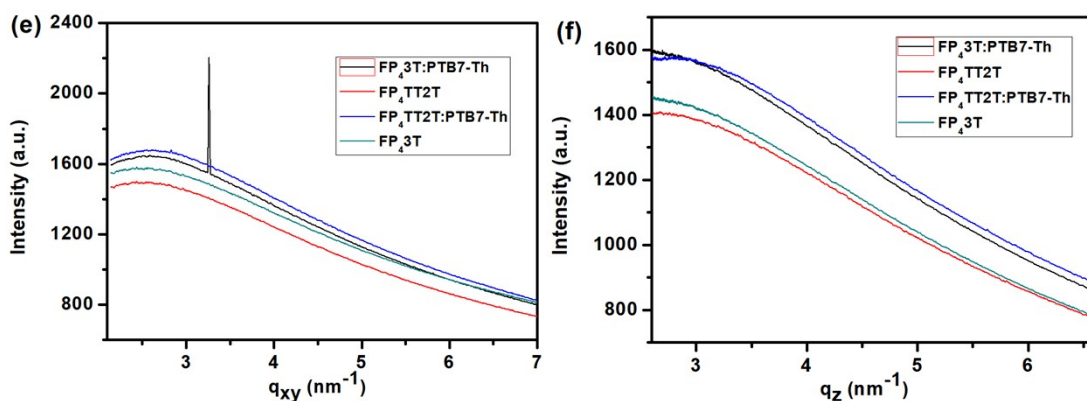

Figure S25. 2D GIXRD patterns of (a) the neat  $FP_43T$  film (b) the PTB7-Th: $FP_43T$  (1:1, w/w) blend film (c) the neat  $FP_4TT2T$  film (d) the PTB7-Th: $FP_4TT2T$  (1:1, w/w) blend films. (e) The in-plane and (f) out-of-plane cuts of the corresponding 2D GIXRD patterns.

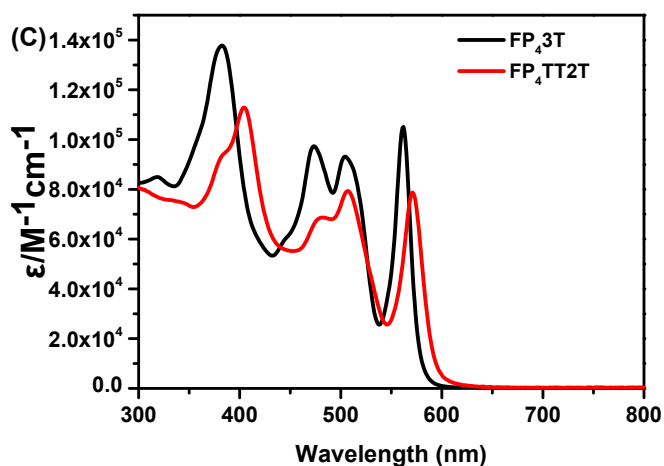

Figure S26. UV-visible absorption spectra of  $FP_4TT2T$  and  $FP_43T$  in  $CH_2Cl_2$  solution.

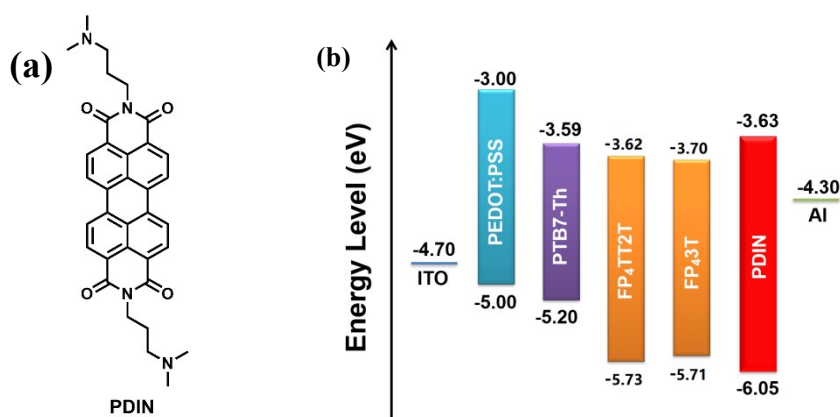

Figure S27. (a) Chemical structure of PDIN. (b) Energy levels of different layers in the BHJ-OSCs.



**Table S1.** Optical and electrochemical properties of P<sub>4</sub>TT2T, FP<sub>4</sub>TT2T, P<sub>4</sub>3T and FP<sub>4</sub>3T.

| <b>Material</b> | $\lambda_{max}$<br>( <i>sol</i> )<br>[nm] <sup>a)</sup> | $\lambda_{max}$<br>( <i>film</i> )<br>[nm] | $E_{red}$<br><i>onset</i><br>[V] <sup>b)</sup> | LUMO<br>[eV] <sup>c)</sup> | Bandgap<br>[eV] <sup>d)</sup> | HOMO<br>[eV] <sup>e)</sup> |
|-----------------|---------------------------------------------------------|--------------------------------------------|------------------------------------------------|----------------------------|-------------------------------|----------------------------|
| <b>P4TT2T</b>   | 366                                                     | 371                                        | -0.32                                          | -3.76                      | 2.12                          | -5.88                      |
| <b>FP4TT2T</b>  | 404                                                     | 406                                        | -0.50                                          | -3.62                      | 2.11                          | -5.73                      |
| <b>P43T</b>     | 531                                                     | 533                                        | -0.31                                          | -3.77                      | 2.00                          | -5.77                      |
| <b>FP43T</b>    | 380                                                     | 385                                        | -0.42                                          | -3.70                      | 2.01                          | -5.71                      |

<sup>a)</sup> Obtained in CH<sub>2</sub>Cl<sub>2</sub> solution; <sup>b)</sup> Measured by cyclic voltammetry; <sup>c)</sup> Calculated by using LUMO = -[  $E_{red}$  onset -  $E_{Fc/Fc+}$  + 4.8] eV; <sup>d)</sup> Estimated based on film absorption onset; <sup>e)</sup> Calculated by using LUMO and  $E_g$  opt.

**Table S2.** Photovoltaic performances of PTB7-Th:P<sub>4</sub>TT2T, PTB7-Th:FP<sub>4</sub>TT2T, PTB7-Th:P<sub>4</sub>3T and PTB7-Th:FP<sub>4</sub>3T solar cells, under illumination of AM1.5G (100 mW cm<sup>-2</sup>).

| D:A <sup>a)</sup>      | $V_{OC}$ [V] | $J_{SC}$ [mA cm <sup>-2</sup> ] | FF [%] | PCE [%] <sup>b)</sup> |
|------------------------|--------------|---------------------------------|--------|-----------------------|
| <b>PTB7-Th:P4TT2T</b>  | 0.91         | 9.5                             | 32.6   | 2.82(2.67)            |
| <b>PTB7-Th:FP4TT2T</b> | 0.92         | 11.9                            | 42.1   | 4.62 (4.34)           |
| <b>PTB7-Th:P43T</b>    | 0.79         | 8.7                             | 38.3   | 2.63 (2.38)           |
| <b>PTB7-Th:FP43T</b>   | 0.86         | 14.7                            | 48.1   | 6.05 5.92)            |

<sup>a)</sup> The optimized donor-to-acceptor ratio was 1:1 (w/w%); <sup>b)</sup> The average data obtained from analysis of 10 devices are shown in brackets.

## Reference

1. H. Zhong, C.-H. Wu, C.-Z. Li, J. Carpenter, C.-C. Chueh, J.-Y. Chen, H. Ade and A. K.-Y. Jen, *Adv. Mater.*, **2016**, 28, 951-958.
2. M.J. Frisch, G. Trucks, H. Schlegel, G. Scuseria, M. Robb, J. Cheeseman, G. Scalmani, V. Barone, B. Mennucci, G.J.I.W. Petersson, CT, Gaussian 09, Revision D. 01, Gaussian, (2009).
3. M. Gg., B. Pj., C. Scott, S. Jr., *Phys. Rev. B*, **1998**, 581, 10371.
